# Supplementary material for: Nationwide implementation of a multifaceted tailored strategy to improve uptake of standardized structured reporting in pathology: an effect and process evaluation
Source: Springer Nature journal article supplement (doi:10.1186/s13012-022-01224-5), 2022-07-30
Supplement: MOESM2 [file 23320910]

## Additional file 2

### Changes to toolbox used for nationwide evaluation

1. Change in method of delivery:
  - a. Audit and feedback reports, 3 issues in total, were send to pathology laboratories instead of monthly telephone conversations on local SSR use
2. Regrouping of tools to clarify accessibility:
  - a. The FAQ was grouped with the website, instead of the feedback procedure.
  - b. The sheet on SSR updates and the Feedback Button were grouped as “PPM features”, to emphasize that these tools are integrated within SSR template software
  - c. The audit and feedback reports were together with the communication manual grouped as “communication”.
3. Lay-out:
  - a. The word “Step” was removed, so no consecutive order of using the tools was suggested.
  - b. The “read more” buttons, including links to (information about) the tools, were highlighted in order to emphasize the ability to click on the link.
