# Supplementary material for: Nationwide implementation of a multifaceted tailored strategy to improve uptake of standardized structured reporting in pathology: an effect and process evaluation
Source: Springer Nature journal article supplement (doi:10.1186/s13012-022-01224-5), 2022-07-30
Supplement: MOESM3 [file 23320910]

**Additional file 3.** Overview of specifications of implementation strategy elements according to the TIDieR checklist (30)

|                                | <b>Toolbox IMPROVING</b>                                   | <b>1) Website</b>                                                                                                                 | <b>2)eLearning</b>                                         | <b>3)Information sheet “SSR updates”</b>                   | <b>4)Feedback procedure</b>                                | <b>5)Audit &amp; Feedback</b>                              | <b>6)Communication manual</b>                              |
|--------------------------------|------------------------------------------------------------|-----------------------------------------------------------------------------------------------------------------------------------|------------------------------------------------------------|------------------------------------------------------------|------------------------------------------------------------|------------------------------------------------------------|------------------------------------------------------------|
| <b>WHY</b>                     |                                                            |                                                                                                                                   |                                                            |                                                            |                                                            |                                                            |                                                            |
| <b>Justification</b>           | Brainstorm: Previous analysis of barriers and facilitators | Brainstorm: Previous analysis of barriers and facilitators                                                                        | Brainstorm: Previous analysis of barriers and facilitators | Brainstorm: Previous analysis of barriers and facilitators | Brainstorm: Previous analysis of barriers and facilitators | Brainstorm: Previous analysis of barriers and facilitators | Brainstorm: Previous analysis of barriers and facilitators |
| <b>Kok et al. (43) methods</b> | N.A.                                                       | Persuasive communication                                                                                                          | Active learning                                            | Facilitation                                               | Participation                                              | Feedback                                                   | Advocacy and lobbying                                      |
|                                |                                                            | Advance organizers                                                                                                                | Modeling                                                   |                                                            | Technical assistance                                       |                                                            | Modeling                                                   |
|                                |                                                            |                                                                                                                                   | Elaboration                                                |                                                            | Advance Organizers                                         |                                                            |                                                            |
| <b>WHAT</b>                    | Dissemination                                              | Inform                                                                                                                            | Inform and learn                                           | Inform                                                     | Motivate to provide feedback                               | Provide feedback to encourage use of SSR                   | Communicate and support                                    |
| <b>Materials<sup>A</sup></b>   | Infographic                                                | Webpages                                                                                                                          | eLearning modules                                          | Information sheet, part of all SSR templates               | Feedback button, part of all SSR templates                 | Audit and feedback reports                                 | Communication Manual                                       |
| <b>Procedures</b>              | Infographic was provided to pathologists in multiple ways  | Via the toolbox (infographic) or directly via the PALGA website, pathologists had access to webpages providing information on SSR |                                                            |                                                            |                                                            |                                                            |                                                            |



|                |                                                                                                                                                                                                                                                |
|----------------|------------------------------------------------------------------------------------------------------------------------------------------------------------------------------------------------------------------------------------------------|
| <b>Planned</b> | Individual elements could be used digitally on an as-needed basis. We evaluated the actual use of the implementation strategy (elements) on a national level. This is reported in the Method section of this article.                          |
| <b>Actual</b>  | Actual use was already evaluated in our pilot study, reported in Swillens et al. (22). We also evaluated the actual use of the implementation strategy (elements) on a national level. This is reported in the Result section of this article. |

<sup>A</sup>Materials are reported in Swillens et al. (22) and a preview of the audit and feedback report in additional file 4

<sup>B</sup>Professional association for developing SSR templates
