# Supplementary material for: Nationwide implementation of a multifaceted tailored strategy to improve uptake of standardized structured reporting in pathology: an effect and process evaluation
Source: Springer Nature journal article supplement (doi:10.1186/s13012-022-01224-5), 2022-07-30
Supplement: MOESM5 [file 23320910]

## Supplemental File 5

Selection criteria qualifying cases for effect evaluation

| SSR template <sup>A</sup>    | Tissue                                                    | Retrieval technique                                     |
|------------------------------|-----------------------------------------------------------|---------------------------------------------------------|
| Appendix cancer              | Appendix                                                  | All resections (with curettages and small excisions)    |
| Bladder/Urethra cancer       | (Bladder <b>OR</b> Urethra)                               | All resections (with curettages and small excisions)    |
|                              |                                                           | Biopsy                                                  |
| Cervical cancer              | (Cervix <b>OR</b> UterusCervix <b>OR</b> Vagina)          | All resections (with curettages and small excisions)    |
|                              |                                                           | Biopsy                                                  |
| Colorectal cancer*           | (Colon <b>OR</b> Rectum)                                  | All resections (without curettages and small excisions) |
| Endometrial cancer           | (Endometrium <b>OR</b> UterusEndometrium <b>OR</b> Adnex) | All resections (with curettages and small excisions)    |
|                              |                                                           | Biopsy                                                  |
| Gastric / Oesophageal cancer | (Esophagus <b>OR</b> Gastric)                             | All resections (with curettages and small excisions)    |
| Kidney/Pyelum/ureter cancer  | (Kidney <b>OR</b> Pyelum <b>OR</b> Ureter)                | All resections (with curettages and small excisions)    |
| Ovarian cancer               | (Ovary <b>OR</b> Tuba)                                    | All resections (with curettages and small excisions)    |
| Pancreatic cancer            | Pancreas                                                  | All resections (with curettages and small excisions)    |
|                              |                                                           | Biopsy                                                  |
| Prostate cancer              | Prostate                                                  | All resections (with curettages and small excisions)    |
| Prostate biopsy              | Prostate                                                  | Biopsy                                                  |
| Testis cancer                | Testis                                                    | All resections (with curettages and small excisions)    |

<sup>A</sup>Some tissue types have specific biopsy SSR templates used for reporting

In all selections molecular diagnostics and consultation/revision are excluded

\* excluding (hyperplastic) polyp, adenoma, dysplasia, Inflammatory bowel disease, inflammation, infection, necroses, endometriosis, Hirschsprung, stoma, pouch, ischemia, cyst, lymphoma
