# Supplementary material for: Nationwide implementation of a multifaceted tailored strategy to improve uptake of standardized structured reporting in pathology: an effect and process evaluation
Source: Springer Nature journal article supplement (doi:10.1186/s13012-022-01224-5), 2022-07-30
Supplement: MOESM6 [file 23320910]

Additional file 6

| Objective                                               | Analysis                         | Outcome                                                                                                                           | Unit of analysis                                 | Time(s) of measurement                                                         |
|---------------------------------------------------------|----------------------------------|-----------------------------------------------------------------------------------------------------------------------------------|--------------------------------------------------|--------------------------------------------------------------------------------|
| Evaluate effect of nationwide implementation            | Interrupted time series analysis | Proportion of SSR usage out of total pathology reporting per week                                                                 | Pathology report                                 | 26 times before strategy introduction, 26 times after strategy introduction    |
| <i>Subgroup analysis</i>                                | <i>Subgroup</i>                  | <i>Groups</i>                                                                                                                     |                                                  |                                                                                |
|                                                         | Tumor types                      | Gastrointestinal                                                                                                                  |                                                  |                                                                                |
|                                                         |                                  | Gynecological                                                                                                                     |                                                  |                                                                                |
|                                                         |                                  | Urological                                                                                                                        |                                                  |                                                                                |
|                                                         | Retrieval method                 | Biopsies                                                                                                                          |                                                  |                                                                                |
|                                                         |                                  | Resections                                                                                                                        |                                                  |                                                                                |
|                                                         | Type of laboratory               | Non-academic                                                                                                                      |                                                  |                                                                                |
|                                                         |                                  | Academic                                                                                                                          |                                                  |                                                                                |
| Evaluate SSR use per laboratory                         | Descriptive statistics           | Average proportion of SSR usage out of total pathology reporting                                                                  | Pathology report                                 | 2 times (Before and after strategy introduction)                               |
| <i>Subgroup analysis</i>                                | <i>Subgroup</i>                  | <i>Groups</i>                                                                                                                     |                                                  |                                                                                |
|                                                         | Retrieval method                 | Biopsies                                                                                                                          |                                                  |                                                                                |
|                                                         |                                  | Resections                                                                                                                        |                                                  |                                                                                |
|                                                         | Tumor types                      | Gynecological                                                                                                                     |                                                  |                                                                                |
|                                                         |                                  | Gastrointestinal                                                                                                                  |                                                  |                                                                                |
|                                                         |                                  | Urological                                                                                                                        |                                                  |                                                                                |
| Evaluate actual use of implementation strategy elements | Descriptive statistics           | Binary outcome use/not use of implementation strategy element                                                                     | Pathology laboratory                             | 1 time (during strategy introduction)                                          |
| User experiences                                        | Descriptive statistics           | Accessibility                                                                                                                     | Pathologist, pathology resident or PALGA liaison | 1 time (after strategy introduction)                                           |
|                                                         |                                  | Content                                                                                                                           |                                                  |                                                                                |
|                                                         |                                  | Usability                                                                                                                         |                                                  |                                                                                |
| Self-reported effectiveness                             | Descriptive statistics           | More use of SSR                                                                                                                   | Pathologist, pathology resident or PALGA liaison | 1 time (after strategy introduction)                                           |
|                                                         |                                  | Better use of SSR                                                                                                                 |                                                  |                                                                                |
| Combined effect                                         | Combined effect analysis         | Proportion of SSR usage out of total pathology reporting per week for three groups (2-3 tools used, 1 tool used and 0 tools used) | Pathology report                                 | 26 times before strategy introduction and 26 times after strategy introduction |
| <i>Subgroup analysis</i>                                | <i>Subgroup</i>                  | <i>Groups</i>                                                                                                                     |                                                  |                                                                                |
|                                                         | Feedback button                  | Users                                                                                                                             |                                                  |                                                                                |
|                                                         |                                  | Non-users                                                                                                                         |                                                  |                                                                                |
|                                                         | eLearning                        | Users                                                                                                                             |                                                  |                                                                                |
|                                                         |                                  | Non-users                                                                                                                         |                                                  |                                                                                |
|                                                         | Audit & feedback                 | Users                                                                                                                             |                                                  |                                                                                |
|                                                         |                                  | Non-users                                                                                                                         |                                                  |                                                                                |
