# Supplementary material for: Nationwide implementation of a multifaceted tailored strategy to improve uptake of standardized structured reporting in pathology: an effect and process evaluation
Source: Springer Nature journal article supplement (doi:10.1186/s13012-022-01224-5), 2022-07-30
Supplement: MOESM7 [file 23320910]

Additional file 7

Number of included pathology reports

| <b>Weeks</b> | <b>Total reporting</b> | <b>Resections</b> | <b>Gastroinstinal</b> | <b>Gynecological</b> | <b>Urological</b> |
|--------------|------------------------|-------------------|-----------------------|----------------------|-------------------|
| 2020         |                        |                   |                       |                      |                   |
| 23           | 3311                   | 1981              | 537                   | 1835                 | 939               |
| 24           | 4079                   | 2405              | 605                   | 2334                 | 1140              |
| 25           | 3953                   | 2346              | 639                   | 2152                 | 1162              |
| 26           | 4014                   | 2448              | 617                   | 2214                 | 1183              |
| 27           | 4069                   | 2435              | 643                   | 2258                 | 1168              |
| 28           | 3927                   | 2332              | 613                   | 2200                 | 1114              |
| 29           | 3790                   | 2177              | 582                   | 2094                 | 1114              |
| 30           | 3376                   | 2063              | 613                   | 1776                 | 987               |
| 31           | 3248                   | 1975              | 556                   | 1734                 | 958               |
| 32           | 3384                   | 1967              | 555                   | 1867                 | 962               |
| 33           | 3264                   | 1938              | 576                   | 1781                 | 907               |
| 34           | 3673                   | 2099              | 571                   | 2082                 | 1020              |
| 35           | 4006                   | 2388              | 620                   | 2278                 | 1108              |
| 36           | 4109                   | 2450              | 646                   | 2286                 | 1177              |
| 37           | 4173                   | 2493              | 654                   | 2253                 | 1266              |
| 38           | 4200                   | 2480              | 657                   | 2317                 | 1226              |
| 39           | 4196                   | 2467              | 579                   | 2363                 | 1254              |
| 40           | 4308                   | 2582              | 626                   | 2401                 | 1281              |
| 41           | 4405                   | 2482              | 600                   | 2496                 | 1309              |
| 42           | 3958                   | 2257              | 539                   | 2224                 | 1195              |
| 43           | 4020                   | 2243              | 559                   | 2365                 | 1096              |
| 44           | 4194                   | 2284              | 578                   | 2460                 | 1156              |
| 45           | 4320                   | 2431              | 604                   | 2479                 | 1237              |
| 46           | 4124                   | 2301              | 597                   | 2367                 | 1160              |
| 47           | 4416                   | 2495              | 629                   | 2566                 | 1221              |
| 48           | 4340                   | 2530              | 620                   | 2437                 | 1283              |
| <i>Total</i> | <i>102,857</i>         | <i>60,049</i>     | <i>15,615</i>         | <i>57,619</i>        | <i>29,623</i>     |
| 2021         |                        |                   |                       |                      |                   |
| 22           | 4602                   | 2710              | 680                   | 2633                 | 1289              |
| 23           | 4667                   | 2781              | 728                   | 2603                 | 1336              |
| 24           | 4599                   | 2670              | 683                   | 2613                 | 1303              |
| 25           | 4469                   | 2684              | 701                   | 2470                 | 1298              |
| 26           | 4534                   | 2670              | 741                   | 2544                 | 1249              |
| 27           | 4572                   | 2710              | 710                   | 2600                 | 1262              |
| 28           | 4417                   | 2595              | 700                   | 2467                 | 1250              |
| 29           | 3874                   | 2294              | 581                   | 2184                 | 1109              |
| 30           | 3637                   | 2120              | 597                   | 1969                 | 1071              |
| 31           | 3487                   | 2042              | 588                   | 1930                 | 969               |
| 32           | 3386                   | 1979              | 554                   | 1830                 | 1002              |
| 33           | 3460                   | 2082              | 565                   | 1895                 | 1000              |
| 34           | 3929                   | 2262              | 633                   | 2272                 | 1024              |
| 35           | 3919                   | 2391              | 556                   | 2245                 | 1118              |
| 36           | 4342                   | 2520              | 686                   | 2484                 | 1172              |
| 37           | 4330                   | 2584              | 683                   | 2434                 | 1213              |

| <b>Weeks</b> | <b>Total reporting</b> | <b>Resections</b> | <b>Gastroinstinal</b> | <b>Gynecological</b> | <b>Urological</b> |
|--------------|------------------------|-------------------|-----------------------|----------------------|-------------------|
| 38           | 4453                   | 2530              | 626                   | 2559                 | 1268              |
| 39           | 4486                   | 2630              | 660                   | 2582                 | 1244              |
| 40           | 4513                   | 2609              | 579                   | 2623                 | 1311              |
| 41           | 4508                   | 2619              | 659                   | 2569                 | 1280              |
| 42           | 3893                   | 2263              | 582                   | 2195                 | 1116              |
| 43           | 4319                   | 2512              | 648                   | 2458                 | 1213              |
| 44           | 4838                   | 2831              | 697                   | 2818                 | 1323              |
| 45           | 4683                   | 2613              | 668                   | 2725                 | 1290              |
| 46           | 4327                   | 2524              | 621                   | 2444                 | 1262              |
| 47           | 4384                   | 2417              | 557                   | 2616                 | 1211              |
| <i>Total</i> | <i>110,628</i>         | <i>64,642</i>     | <i>16,683</i>         | <i>62,762</i>        | <i>31,183</i>     |
